# Supplementary material
Source: PubMed Central journal article supplement (PMC3857013)
Supplement: Supp_Fig1.pdf [file Supp_Fig1.pdf]

## Supplementary Data

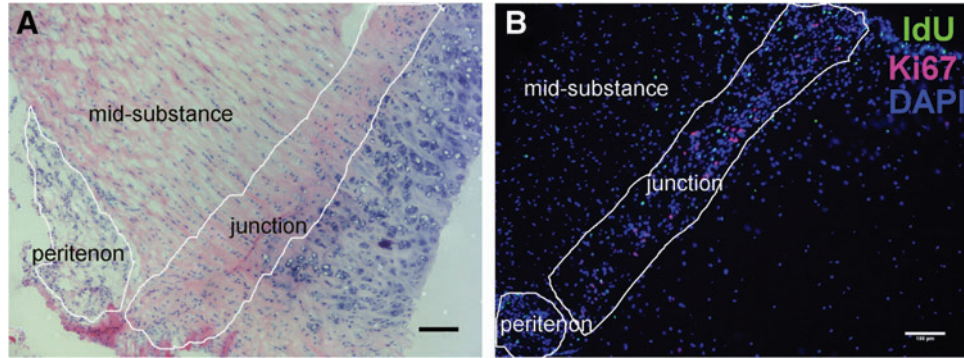

**SUPPLEMENTARY FIG. S1.** (A) Photomicrograph (hematoxylin and eosin) and (B) fluorescent image showing the peritenon, mid-substance, and tendon–bone junction excluding the hypertrophic chondrocyte zone in rat patellar tendon that were analyzed after iododeoxyuridine (IdU) labeling. Scale bar = 100  $\mu$ m.
